# Supplementary material
Source: PubMed Central journal article supplement (PMC8892373)
Supplement: jamacardiol-e215244-s003.pdf [file jamacardiol-e215244-s003.pdf]

\*Indicates required information. Only first name, last name, and suffix will appear in PubMed.

| <b>*Group Name(s): STOPDAPT-2 ACS Investigators</b> |                   |                              |                  |                                               |                                          |                                                         |                                                                                            |
|-----------------------------------------------------|-------------------|------------------------------|------------------|-----------------------------------------------|------------------------------------------|---------------------------------------------------------|--------------------------------------------------------------------------------------------|
| <b>*First Name and Middle Initial(s)</b>            | <b>*Last Name</b> | <b>*Suffix (eg, Jr, III)</b> | Academic Degrees | Institution                                   | Location (city, state/province, country) | Role or Contribution, eg, chair, principal investigator | Group (if more than 1 Group listed in the byline) and/or Subgroup (eg, Steering Committee) |
| Ken                                                 | Kozuma            |                              | MD               | Teikyo University                             | Tokyo                                    | Study Organization                                      | Steering Committee                                                                         |
| Keiichi                                             | Hanaoka           |                              | MD               | Hanaoka Seishu Memorial Hospital              | Sapporo                                  | Study Organization                                      | Steering Committee                                                                         |
| Saori                                               | Tezuka            |                              |                  | Research Institute for Production Development | Kyoto                                    | Study Coordinating Center                               |                                                                                            |
| Yumika                                              | Fujino            |                              |                  | Research Institute for Production Development | Kyoto                                    | Study Coordinating Center                               |                                                                                            |
| Risa                                                | Kato              |                              |                  | Research Institute for Production Development | Kyoto                                    | Study Coordinating Center                               |                                                                                            |
| Masayo                                              | Kitamura          |                              |                  | Research Institute for Production Development | Kyoto                                    | Study Coordinating Center                               |                                                                                            |
| Miyuki                                              | Tsumori           |                              |                  | Research Institute for Production Development | Kyoto                                    | Study Coordinating Center                               |                                                                                            |
| Miya                                                | Hanazawa          |                              |                  | Research Institute for Production Development | Kyoto                                    | Study Coordinating Center                               |                                                                                            |
| Misato                                              | Yamauchi          |                              |                  | Research Institute for Production Development | Kyoto                                    | Study Coordinating Center                               |                                                                                            |
| Itsuki                                              | Yamazaki          |                              |                  | Research Institute for Production Development | Kyoto                                    | Study Coordinating Center                               |                                                                                            |
| Mitsugu                                             | Hirokami          |                              | MD               | Teine Keijinkai Hospital                      | Sapporo                                  | Principal investigator                                  |                                                                                            |
| Nobuko                                              | Makiguchi         |                              | MD               | Megumino Hospital                             | Eniwa                                    | Principal investigator                                  |                                                                                            |
| Yoichi                                              | Nozaki            |                              | MD               | Hokko Memorial Hospital                       | Sapporo                                  | Principal investigator                                  |                                                                                            |
| Hirofumi                                            | Tomita            |                              | MD               | Hirosaki University Hospital                  | Hirosaki                                 | Principal investigator                                  |                                                                                            |
| Masahiro                                            | Yagi              |                              | MD               | Sendai Cardiovascular Center                  | Sendai                                   | Principal investigator                                  |                                                                                            |
| Tatsuya                                             | Komaru            |                              | MD               | Tohoku Medical and Pharmaceutical             | Sendai                                   | Principal investigator                                  |                                                                                            |
| Motoaki                                             | Higuchi           |                              | MD               | Mito Saiseikai General Hospital               | Mito                                     | Principal investigator                                  |                                                                                            |
| Takaaki                                             | Isshiki           |                              | MD               | Ageo Central General Hospital                 | Ageo                                     | Principal investigator                                  |                                                                                            |
| Takahide                                            | Kodama            |                              | MD               | Toranomon Hospital                            | Tokyo                                    | Principal investigator                                  |                                                                                            |
| Atsushi                                             | Tosaka            |                              | MD               | Kawakita General Hospital                     | Tokyo                                    | Principal investigator                                  |                                                                                            |

## Supplemental Online Content: Nonauthor Collaborators

\*Indicates required information. Only first name, last name, and suffix will appear in PubMed.

| *First Name and Middle Initial(s) | *Last Name | *Suffix (eg, Jr, III) | Academic Degrees | Institution                          | Location (city, state/province, country) | Role or Contribution, eg, chair, principal investigator | Group (if more than 1 Group listed in the byline) and/or Subgroup (eg, Steering Committee) |
|-----------------------------------|------------|-----------------------|------------------|--------------------------------------|------------------------------------------|---------------------------------------------------------|--------------------------------------------------------------------------------------------|
| Itaru                             | Takamisawa |                       | MD               | Sakakibara Heart Institute           | Fuchu                                    | Principal investigator                                  |                                                                                            |
| Hiroyuki                          | Tanaka     |                       | MD               | Tokyo Metropolitan Tama Medical Ce   | Fuchu                                    | Principal investigator                                  |                                                                                            |
| Yoshiki                           | Hata       |                       | MD               | Minamino Cardiovascular Hospital     | Hachioji                                 | Principal investigator                                  |                                                                                            |
| Ryuichi                           | Kato       |                       | MD               | Higashiyamoto Hospital               | Higashiyamoto                            | Principal investigator                                  |                                                                                            |
| Yoshihiro                         | Akashi     |                       | MD               | St.Marianna University School of Me  | Kawasaki                                 | Principal investigator                                  |                                                                                            |
| Kazuhiko                          | Yumoto     |                       | MD               | Yokohama Rosai Hospital              | Yokohama                                 | Principal investigator                                  |                                                                                            |
| Kengo                             | Tsukahara  |                       | MD               | Fujisawa City Hospital               | Fujisawa                                 | Principal investigator                                  |                                                                                            |
| Junya                             | Ako        |                       | MD               | Kitasato University Hospital         | Sagamihara                               | Principal investigator                                  |                                                                                            |
| Yuko                              | Onishi     |                       | MD               | Hiratsuka Kyosai Hospital            | Hiratsuka                                | Principal investigator                                  |                                                                                            |
| Hiroyasu                          | Uzui       |                       | MD               | University of Fukui Hospital         | Fukui                                    | Principal investigator                                  |                                                                                            |
| Toshiyuki                         | Noda       |                       | MD               | Gifu Prefectural General Medical Cer | Gifu                                     | Principal investigator                                  |                                                                                            |
| Itsuo                             | Morishima  |                       | MD               | Ogaki Municipal Hospital             | Ogaki                                    | Principal investigator                                  |                                                                                            |
| Minoru                            | Yamada     |                       | MD               | Shizuoka Saiseikai General Hospital  | Shizuoka                                 | Principal investigator                                  |                                                                                            |
| Ruka                              | Yoshida    |                       | MD               | Nagoya Daini Red Cross Hospital      | Nagoya                                   | Principal investigator                                  |                                                                                            |
| Susumu                            | Suzuki     |                       | MD               | Handa City Hospital                  | Handa                                    | Principal investigator                                  |                                                                                            |
| Takuya                            | Maeda      |                       | MD               | Ichinomiyanishi Hospital             | Ichinomiya                               | Principal investigator                                  |                                                                                            |
| Takashi                           | Tanigawa   |                       | MD               | Matsusaka Central General Hospital   | Matsusaka                                | Principal investigator                                  |                                                                                            |
| Kazuaki                           | Kaitani    |                       | MD               | Otsu Red Cross Hospital              | Otsu                                     | Principal investigator                                  |                                                                                            |
| Shunzo                            | Matsuoka   |                       | MD               | Uji Tokushukai Hospital              | Uji                                      | Principal investigator                                  |                                                                                            |
| Masaharu                          | Akao       |                       | MD               | Kyoto Medical Center                 | Kyoto                                    | Principal investigator                                  |                                                                                            |
| Takafumi                          | Yokomatsu  |                       | MD               | Mitsubishi Kyoto Hospital            | Kyoto                                    | Principal investigator                                  |                                                                                            |
| Moriaki                           | Inoko      |                       | MD               | Kitano Hospital                      | Osaka                                    | Principal investigator                                  |                                                                                            |
| Tsukasa                           | Inada      |                       | MD               | Osaka Red Cross Hospital             | Osaka                                    | Principal investigator                                  |                                                                                            |
| Takashi                           | Morita     |                       | MD               | Osaka General Medical Center         | Osaka                                    | Principal investigator                                  |                                                                                            |
| Gaku                              | Nakazawa   |                       | MD               | Kindai University Hospital           | Sayama                                   | Principal investigator                                  |                                                                                            |
| Shozo                             | Ishihara   |                       | MD               | Mimihara General Hospital            | Sakai                                    | Principal investigator                                  |                                                                                            |
| Makoto                            | Kinoshita  |                       | MD               | Kobe City Medical Center General Ho  | Kobe                                     | Principal investigator                                  |                                                                                            |
| Takanori                          | Kusuyama   |                       | MD               | Tsukazaki Hospital                   | Himeji                                   | Principal investigator                                  |                                                                                            |
| Kiyonori                          | Togi       |                       | MD               | Kindai University Nara Hospital      | Ikoma                                    | Principal investigator                                  |                                                                                            |
| Toshihiro                         | Tamura     |                       | MD               | Tenri Hospital                       | Tenri                                    | Principal investigator                                  |                                                                                            |
| Takashi                           | Akasaka    |                       | MD               | Wakayama Medical University Hospit   | Wakayama                                 | Principal investigator                                  |                                                                                            |

## Supplemental Online Content: Nonauthor Collaborators

\*Indicates required information. Only first name, last name, and suffix will appear in PubMed.

| *First Name and Middle Initial(s) | *Last Name | *Suffix (eg, Jr, III) | Academic Degrees | Institution                         | Location (city, state/province, country) | Role or Contribution, eg, chair, principal investigator | Group (if more than 1 Group listed in the byline) and/or Subgroup (eg, Steering Committee) |
|-----------------------------------|------------|-----------------------|------------------|-------------------------------------|------------------------------------------|---------------------------------------------------------|--------------------------------------------------------------------------------------------|
| Isao                              | Tabuchi    |                       | MD               | Okayama Medical Center              | Okayama                                  | Principal investigator                                  |                                                                                            |
| Yasuki                            | Kihara     |                       | MD               | Hiroshima University Hospital       | Hiroshima                                | Principal investigator                                  |                                                                                            |
| Hironori                          | Ueda       |                       | MD               | Hiroshima Prefectural Hospital      | Hiroshima                                | Principal investigator                                  |                                                                                            |
| Yusuke                            | Katayama   |                       | MD               | Iwakuni Medical Center              | Iwakuni                                  | Principal investigator                                  |                                                                                            |
| Takatoshi                         | Wakeyama   |                       | MD               | Tokuyama Central Hospital           | Shunan                                   | Principal investigator                                  |                                                                                            |
| Takeo                             | Kaneko     |                       | MD               | Shimonoseki City Hospital           | Shimonoseki                              | Principal investigator                                  |                                                                                            |
| Tetsuzo                           | Wakatsuki  |                       | MD               | Tokushima University Hospital       | Tokushima                                | Principal investigator                                  |                                                                                            |
| Koichi                            | Kishi      |                       | MD               | Tokushima Red Cross Hospital        | Komatsushima                             | Principal investigator                                  |                                                                                            |
| Masayuki                          | Doi        |                       | MD               | Kagawa Prefectural Central Hospital | Takamatsu                                | Principal investigator                                  |                                                                                            |
| Hideki                            | Okayama    |                       | MD               | Ehime Prefectural Central Hospital  | Matsuyama                                | Principal investigator                                  |                                                                                            |
| Nobuhiro                          | Suematsu   |                       | MD               | Saiseikai Fukuoka General Hospital  | Fukuoka                                  | Principal investigator                                  |                                                                                            |
| Shujiro                           | Inoue      |                       | MD               | Iizuka Hospital                     | Iizuka                                   | Principal investigator                                  |                                                                                            |
| Masahiro                          | Natsuaki   |                       | MD               | Saga University Hospital            | Saga                                     | Principal investigator                                  |                                                                                            |
| Kenichi                           | Tsujita    |                       | MD               | Kumamoto University Hospital        | Kumamoto                                 | Principal investigator                                  |                                                                                            |
| Tomohiro                          | Sakamoto   |                       | MD               | Saiseikai Kumamoto Hospital         | Kumamoto                                 | Principal investigator                                  |                                                                                            |
| Hirofumi                          | Kurokawa   |                       | MD               | Hitoyoshi Medical Center            | Hitoyoshi                                | Principal investigator                                  |                                                                                            |
| Katsuro                           | Kashima    |                       | MD               | Ibusuki Medical Center              | Ibusuki                                  | Principal investigator                                  |                                                                                            |
| Hiroki                            | Uehara     |                       | MD               | Urasoe General Hospital             | Urasoe                                   | Principal investigator                                  |                                                                                            |
