# Supplementary material
Source: PubMed Central journal article supplement (PMC8892373)
Supplement: jamacardiol-e215244-s004.pdf [file jamacardiol-e215244-s004.pdf]

## Data Sharing Statement

Watanabe. Comparison of Clopidogrel Monotherapy After 1 to 2 Months of Dual Antiplatelet Therapy (DAPT) With 12 Months of DAPT in Patients With Acute Coronary Syndrome. *JAMA Cardiol.* Published March 02, 2022. doi:10.1001/jamacardio.2021.5244

### Data

**Data available:** No
